# Supplementary material for: Multi-omic profiling of pathogen-stimulated primary immune cells
Source: PubMed Central journal article supplement (PMC11293528; doi:10.1016/j.isci.2024.110471), 2024-07-06
Supplement: mmc1.pdf [file mmc1.pdf]

**iScience, Volume 27**

## **Supplemental information**

### **Multi-omic profiling of pathogen-stimulated primary immune cells**

**Renee Salz, Emil E. Vorsteveld, Caspar I. van der Made, Simone Kersten, Merel Stemerding, Tabea V. Riepe, Tsung-han Hsieh, Musa Mhlanga, Mihai G. Netea, Pieter-Jan Volders, Alexander Hoischen, and Peter A.C. 't Hoen**

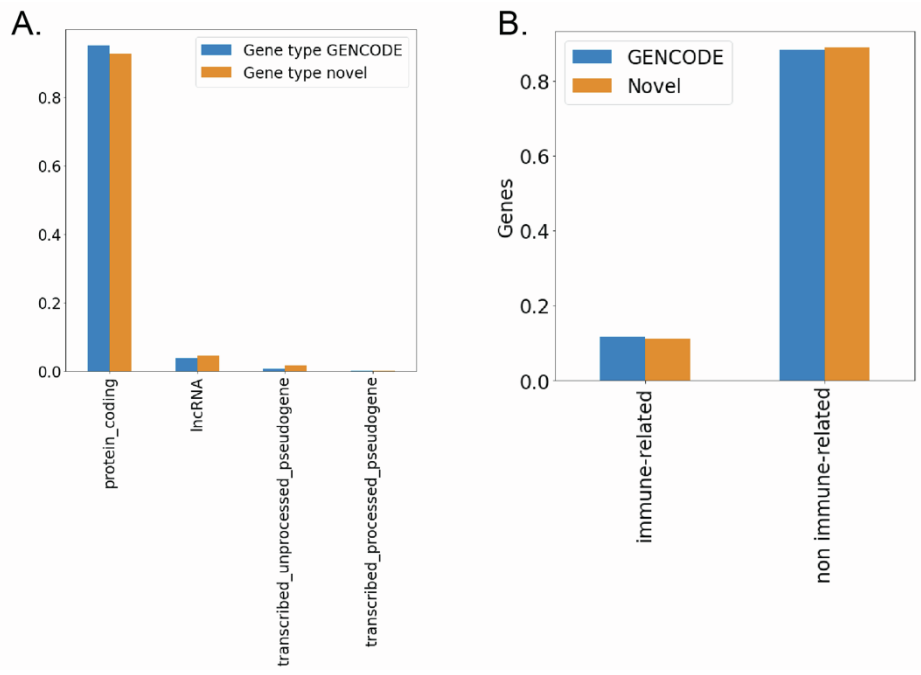

**Figure S1. Gene types where novel transcripts are found, related to Figure 2.** A) Most common categories of genes. B) Categorization by genes that are related to immunity. See also Table S26.

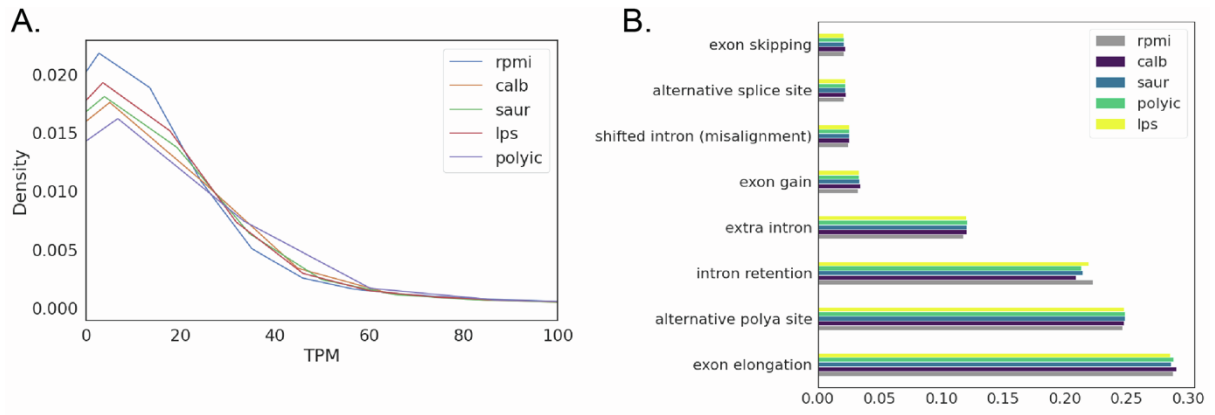

**Figure S2. Transcriptome trends in all conditions, related to Figure 2.** A) TPM distribution for each of the conditions measured. B) Ratios of novelty events in the transcriptome by condition. See also Table S26.

A.

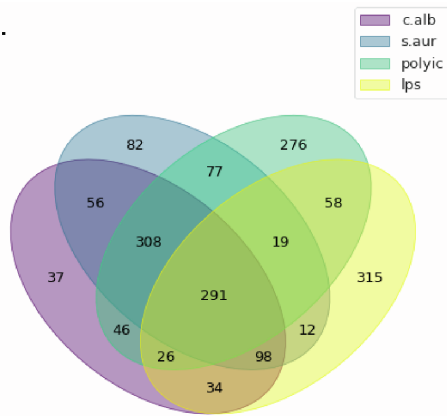

B.

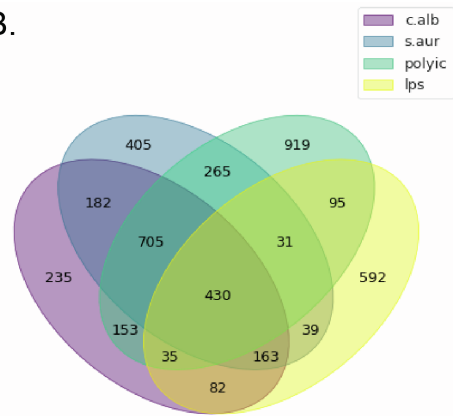

**Figure S3. Differential expression on the RNA level, related to Figure 3. A) Differentially expressed genes. B) Differentially expressed transcripts. See also Tables S1 and S2.**

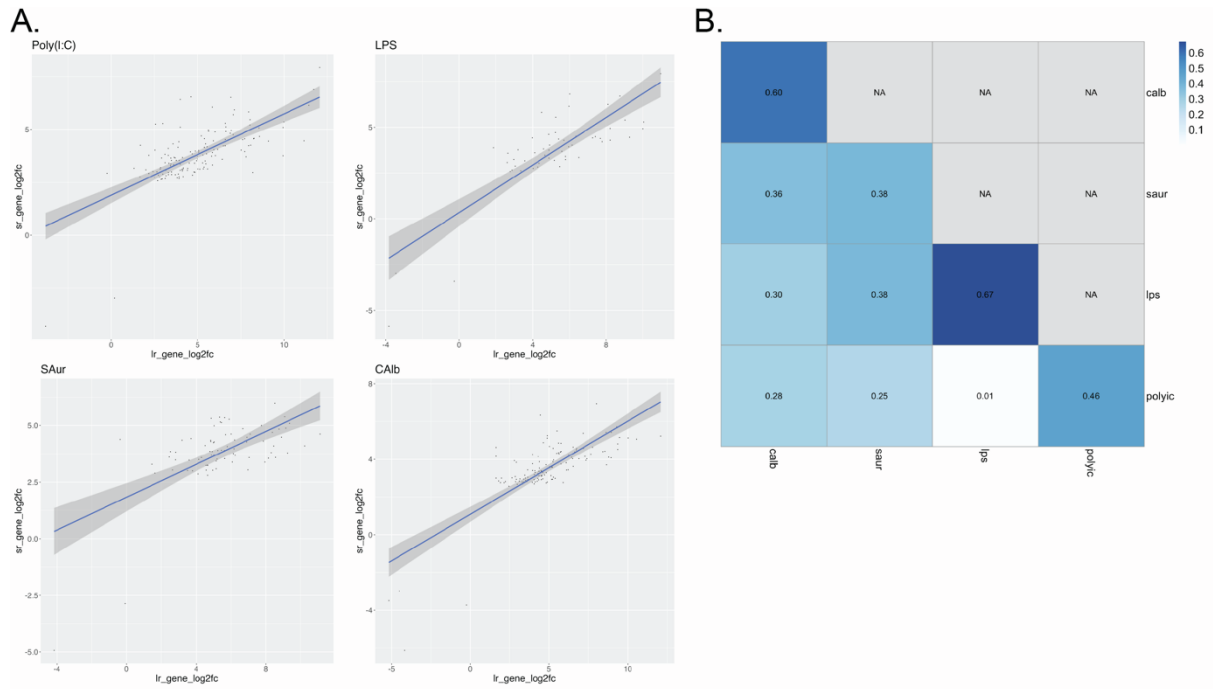

**Figure S4. Differential gene expression validation using short read sequencing (QuantSeq), related to STAR methods.** A) Correlation of DEGs of each condition between long- and short-read sequencing. B) Correlation between long- and short-read sequencing when comparing each condition to each other. See also Table S3.

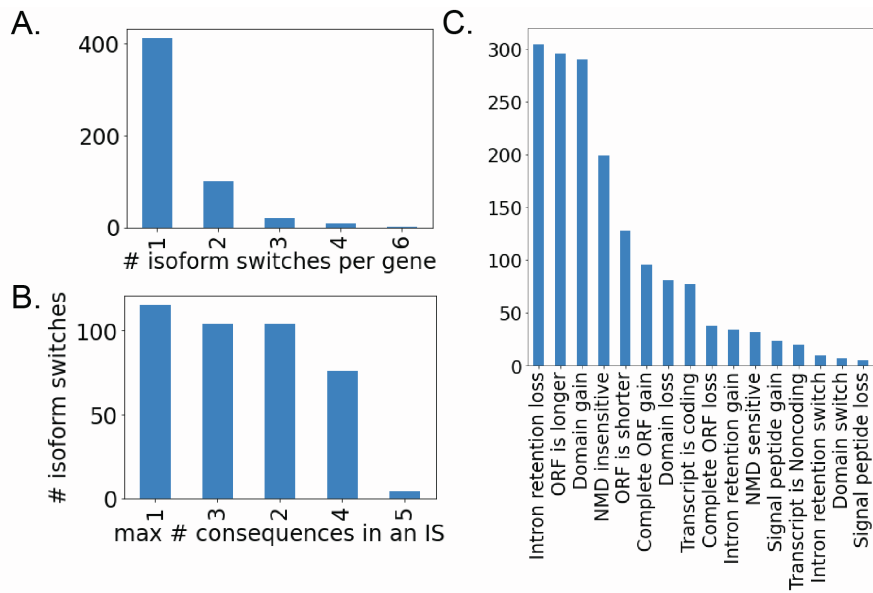

**Figure S5. Overview of isoform switching, related to Figure 4.** D) Number of isoform switches occurring per gene. E) Max number of measured consequences per isoform switch. F) Total number of each type of isoform switching consequence. See also Tables S5 and S6.

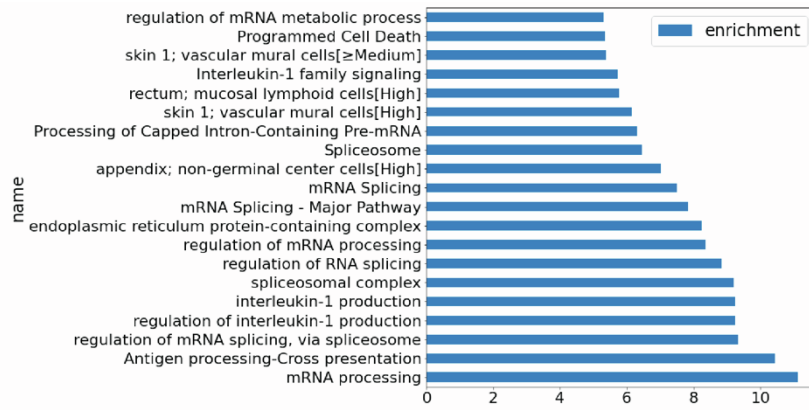

**Figure S6. Pathway analysis of genes affected by intron retention loss, related to Figure 4.** Enrichment was calculated using gProfiler using 304 intron retention loss isoform switches from 145 genes. See also Tables S12 and S13.

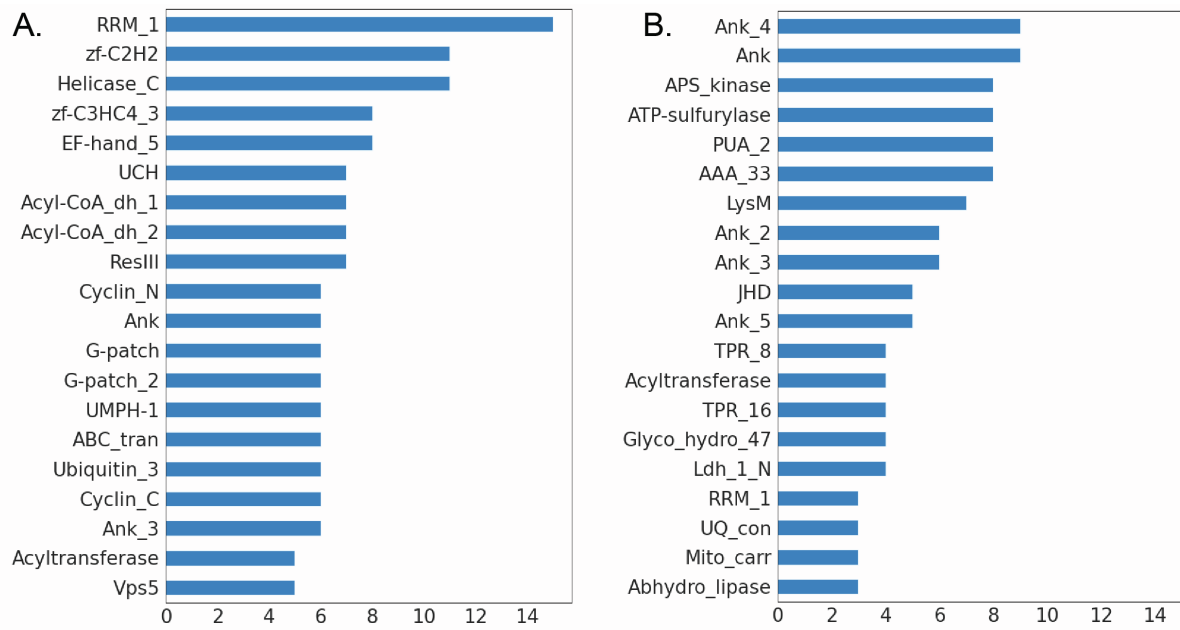

**Figure S7. Domains that were most frequently gained/lost, related to Figure 4.** A) Domains gained. B) Domains lost. See also Tables S14-S16.



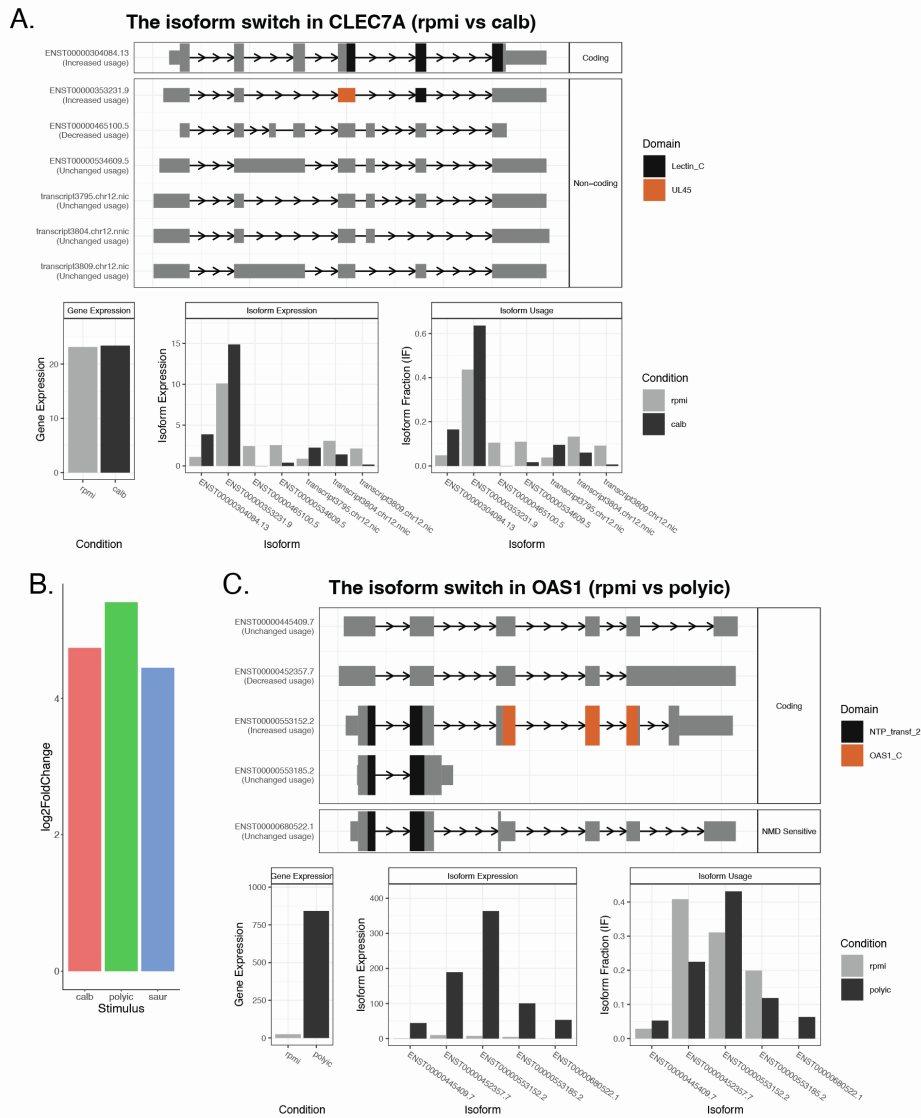

**Figure S8. Examples of stimulus-specific isoform switching, related to Figure 4.** A) isoform switching in CLEC7A specific to *C. albicans* stimulation. B) Differential expression of OAS1 for three stimuli. C) isoform switching of OAS1 specific to Poly(I:C) stimulation. See also Tables S5 and S6.

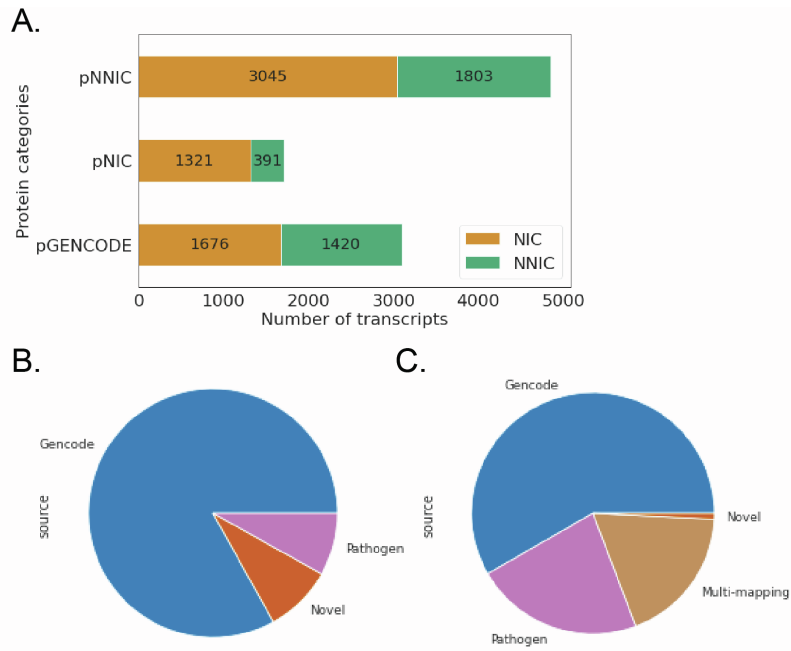

**Figure S9. Open reading frames resulting from novel transcripts and their detectability, related to Figure 7.** A) RNA vs predicted protein novelty. Color indicates RNA novelty category. X-axis corresponds to unique transcripts. B) (Predicted) protein sequences that comprise the full search database. C) Unique peptide sequences in the peptide search database by origin. Multi-mapping indicates 2 or more possible origin categories. See also Table S27 and STAR methods.

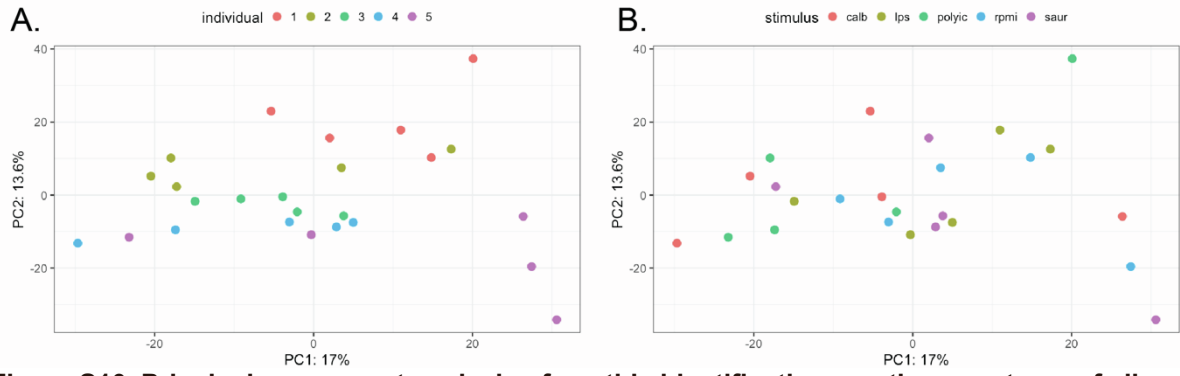

**Figure S10. Principal component analysis of peptide identifications on the secretome of all samples, related to Figure 7. A) Colored by individuals 1-5. B) Colored by stimulus condition. See also Tables S26 and S27.**

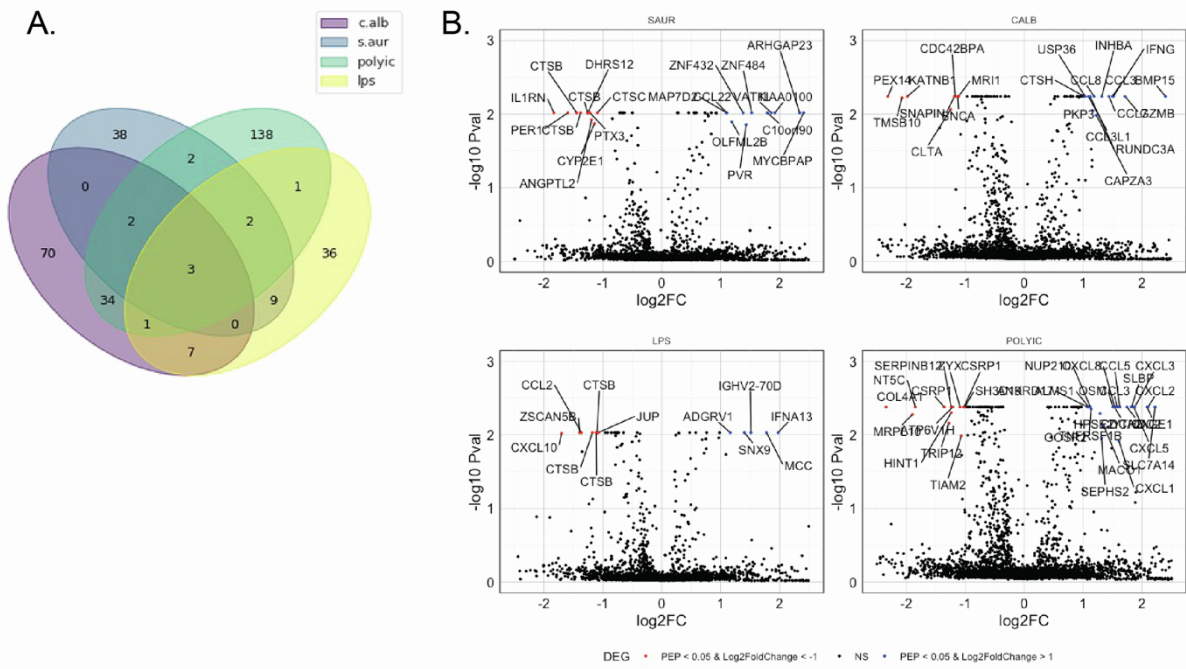

**Figure S11. Differential expression on the secretome, related to Figure 7.** A) Differentially expressed proteins by condition. B) Differentially expressed protein volcano plots per condition. See also Tables S26 and 27.

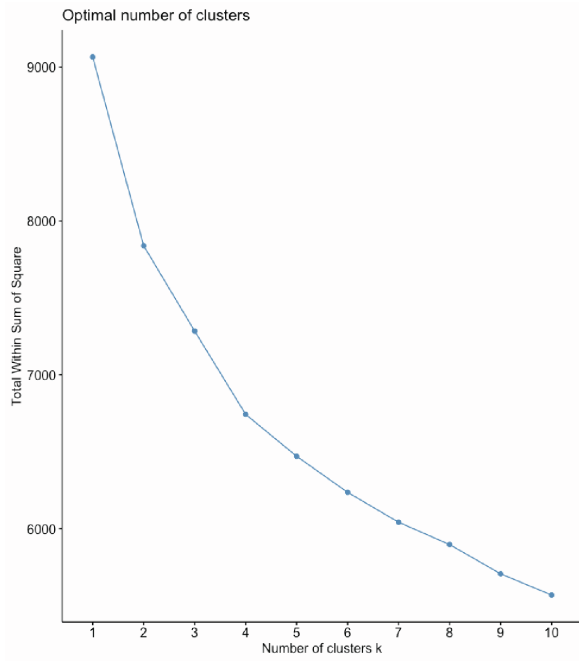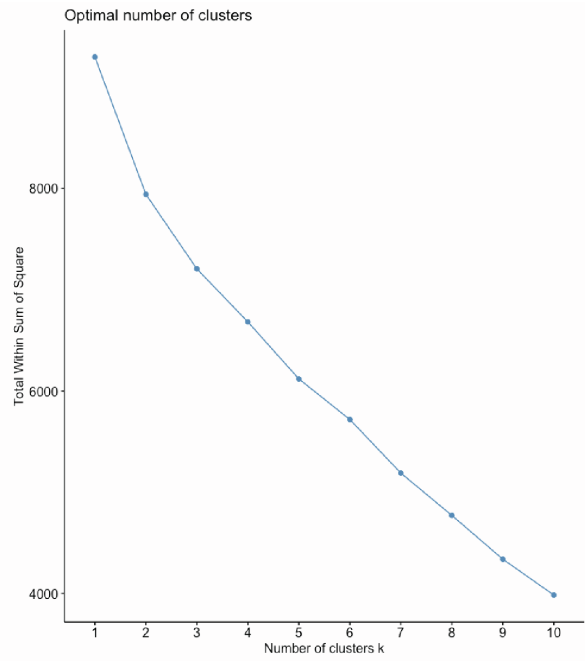

**Figure S12. Elbow plots using kmeans clustering, related to Figure 7.** Elbow plots to determine the optimal number of kmeans clusters to use for clustering of proteomics data. See also Tables S26 and S27.

**Table S17. Transcript novelty combination counts per isoform switch consequence, related to Figure 4.**

| <b>switchConsequence</b> | <b>both known</b> | <b>both novel</b> | <b>novel down</b> | <b>novel up</b> |
|--------------------------|-------------------|-------------------|-------------------|-----------------|
| Complete ORF gain        | 93                | 4                 | 47                | 8               |
| Complete ORF loss        | 21                | 1                 | 14                | 14              |
| Domain gain              | 178               | 26                | 206               | 12              |
| Domain loss              | 45                | 8                 | 21                | 35              |
| Domain switch            | 1                 | 0                 | 5                 | 3               |
| Intron retention gain    | 9                 | 3                 | 24                | 9               |
| Intron retention loss    | 138               | 24                | 269               | 20              |
| Intron retention switch  | 0                 | 0                 | 11                | 1               |
| NMD insensitive          | 51                | 17                | 227               | 1               |
| NMD sensitive            | 4                 | 6                 | 1                 | 30              |
| ORF is longer            | 149               | 28                | 265               | 2               |
| ORF is shorter           | 80                | 12                | 20                | 41              |
| Signal peptide gain      | 21                | 1                 | 10                | 3               |
| Signal peptide loss      | 4                 | 0                 | 0                 | 6               |
| Transcript is Noncoding  | 13                | 0                 | 6                 | 7               |
| Transcript is coding     | 67                | 1                 | 43                | 7               |
